# Supplementary material for: Effects of cucurbituril size on the binding of a lutidine guest
Source: Royal Society of Chemistry journal article supplement (doi:10.1039/c2nj40381a), 2012-01-01
Supplement: c2nj40381a.pdf [file c2nj40381a.pdf]

*NEW JOURNAL of CHEMISTRY*

**Effects of cucurbituril size on the binding of a lutidine guest**

Jan Svec,<sup>a</sup> Vladimir Sindelar\*<sup>a,b</sup> and Angel E. Kaifer\*<sup>c</sup>

<sup>a</sup> Department of Chemistry, Masaryk University, Kamenice 5, 625 00 Brno, Czech Republic

<sup>b</sup> Centre for Toxic Compounds in the Environment, Masaryk University, Kamenice 3, 625 00 Brno, Czech Republic. Fax: (+420)549-49-2443; Tel: (+420)549-49-8142; E-mail: sindelar@chemi.muni.cz

<sup>c</sup> Center for Supramolecular Science and Department of Chemistry, University of Miami, Coral Gables, FL 33124-0431, USA. Fax: 1-305-284-4571; Tel: 1-305-284-3468; E-mail: akaifer@miami.edu

ELECTRONIC SUPPLEMENTARY INFORMATION

## Methods

NMR spectra were recorded using a Bruker Avance 300 spectrometer operating at frequencies of 300.13 MHz ( $^1\text{H}$ ) at 298 K. pD values were obtained using  $\text{H}_2\text{O}$ -calibrated pH-meter after conversion.<sup>1</sup>

## NMR experiments

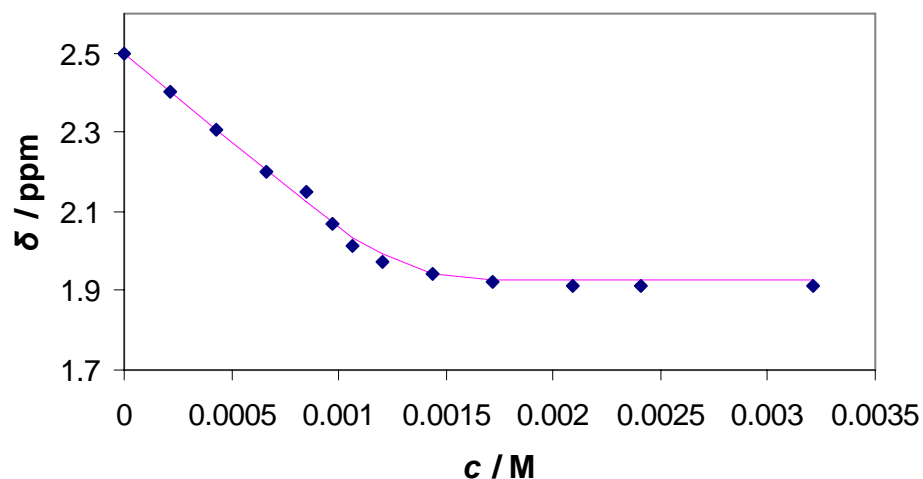

Figure S1.  $^1\text{H}$  NMR (300 MHz) titration curve of  $1^+$  with **CB7** in 0.02 M NaCl- $\text{D}_2\text{O}$ , pD 3. Line shows best fit of the experimental data to the 1:1 binding model.

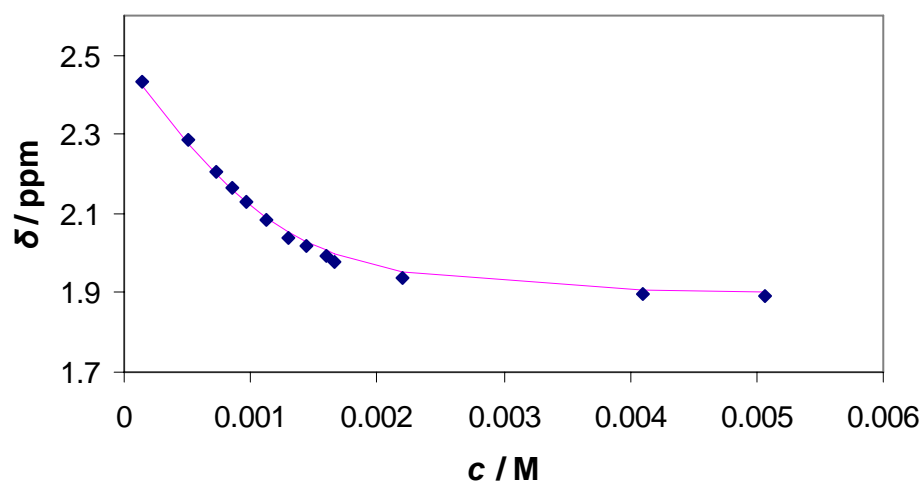

Figure S2.  $^1\text{H}$  NMR (300 MHz) titration curve of  $1^+$  with **CB7** in 0.02 M NaCl- $\text{D}_2\text{O}$ , pD 9. Line shows best fit of the experimental data to the 1:1 binding model.

<sup>1</sup> A. Krezel, W. Bal, *J. Inorg. Biochem.*, 2004, **98**, 161.

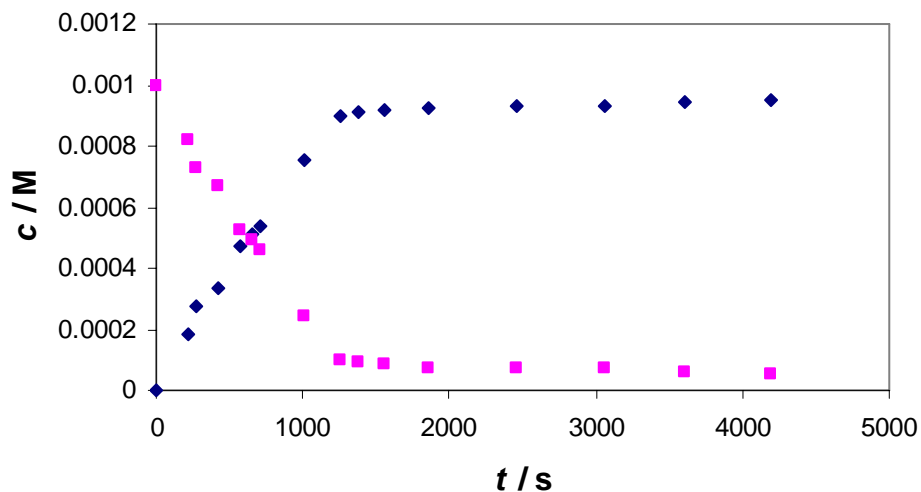

Figure S3. Kinetic traces, recorded at 293 K and pD 9, for the NMR signal intensity changes obtained upon addition of 1.1 equiv of **CB6** to the solution of 1 equiv of **1<sup>+</sup>** and 1.1 equiv of **CB6**.

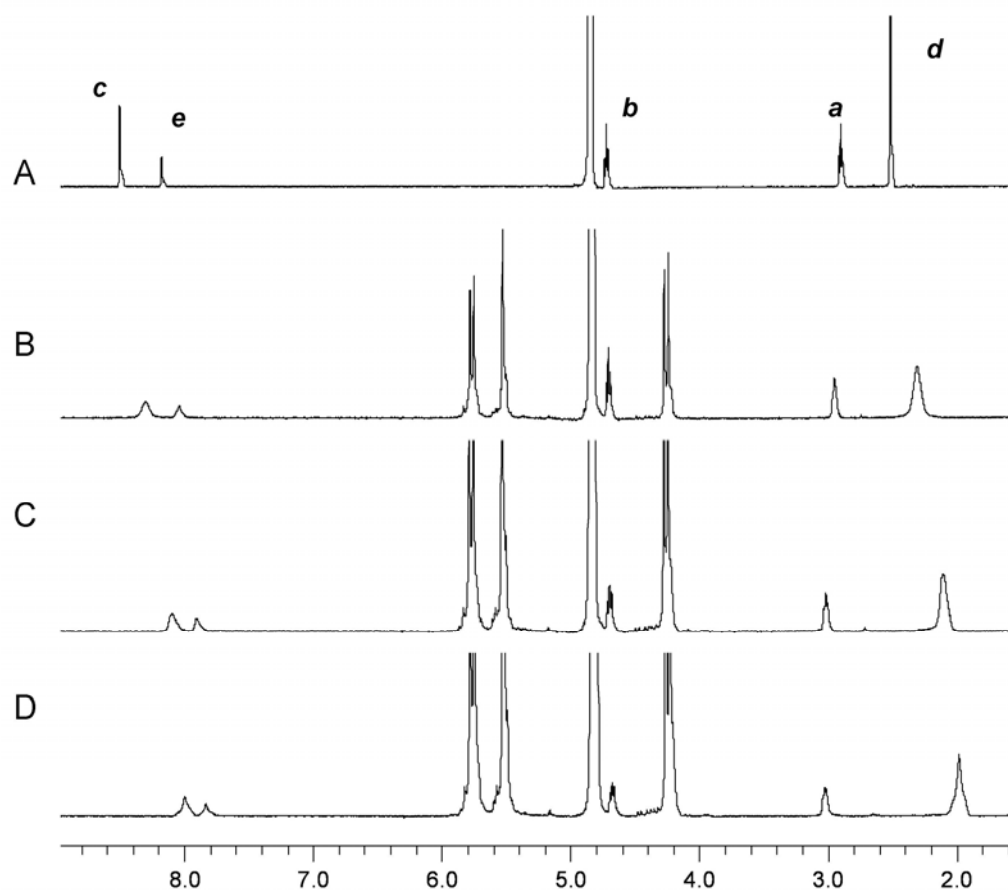

Figure S4. <sup>1</sup>H NMR spectra (300 MHz, 0.02 M NaCl – D<sub>2</sub>O, pD 11) of **1<sup>+</sup>** in the absence (A) and in the presence of 0.5 equiv (B), 1.2 equiv (C), and 1.9 equiv (D) of **CB7**.

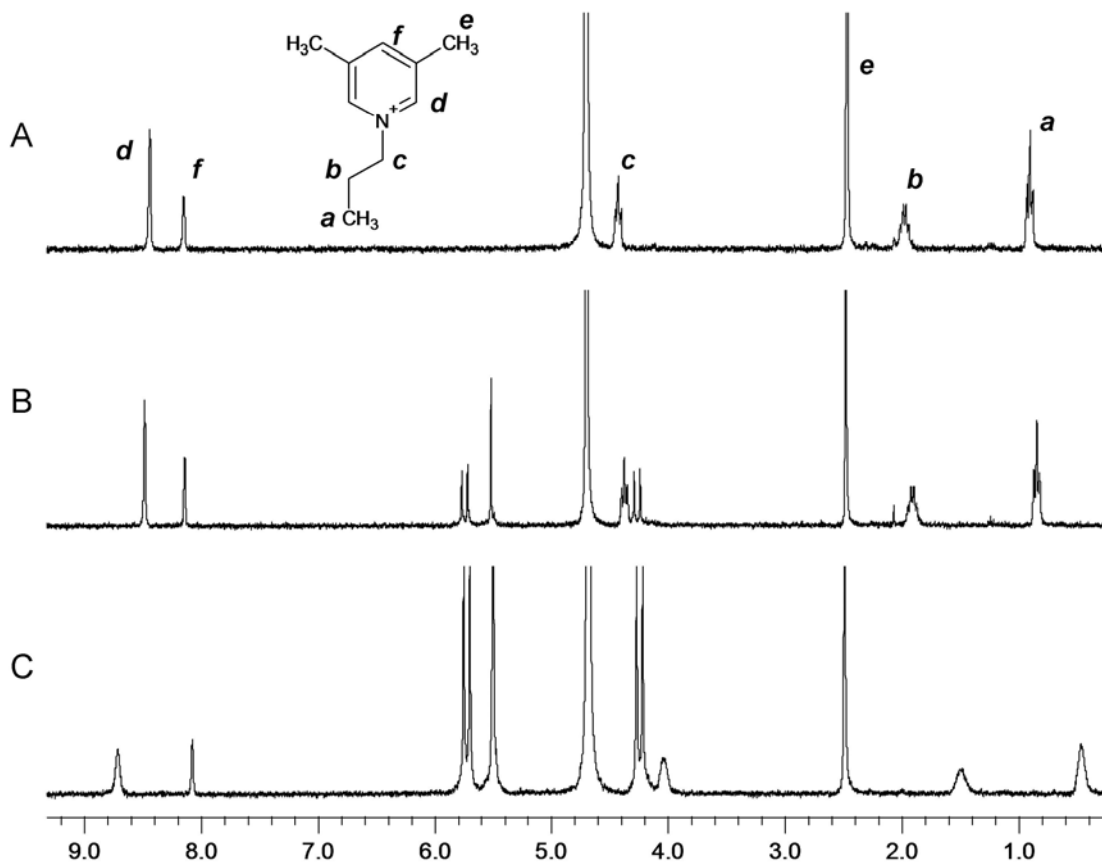

Figure S5.  $^1\text{H}$  NMR spectra (300 MHz, 0.02 M NaCl –  $\text{D}_2\text{O}$ , pD 3) of comparative lutidine guest in the absence (A) and in the presence of 0.2 equiv (B) and 0.7 equiv (C) of **CB6**.
